1 **An innovative approach for determining composite wheat quality index to identify quality**  
2 **enriched genotypes - insights and implications**

3  
4 **D Mohan<sup>1\*</sup>, R Sendhil<sup>2</sup>, Om Prakash Gupta<sup>3\*</sup>, Vanita Pandey<sup>3</sup>, Gopalareddy K<sup>1</sup> and**  
5 **Gyanendra Pratap Singh<sup>1</sup>**

6  
7 <sup>1</sup>Division of Crop Improvement, ICAR-Indian Institute of Wheat and Barley Research, Karnal,  
8 Haryana, India 132001

9 <sup>2</sup>Division of Social Sciences, ICAR-Indian Institute of Wheat and Barley Research, Karnal,  
10 Haryana, India 132001

11 <sup>3</sup>Division of Quality and Basic Sciences, ICAR-Indian Institute of Wheat and Barley Research,  
12 Karnal, Haryana, India 132001

13

14

15

16

17

18

19

20

21 **\*Corresponding author.**

22 D Mohan, PhD

23 E-mail address: [devmohan@gmail.com](mailto:devmohan@gmail.com); Phone: +91-8814067087

24

25 Om Prakash Gupta, PhD

26 Email: [op.gupta@icar.gov.in](mailto:op.gupta@icar.gov.in); Phone: +91-9968768195

27 Orcid Id: <https://orcid.org/0000-0002-1498-9724>

28

29

30

31

32

33

34

35

36

37

38 **Abstract**

39 Ranking test entries or test sites on a quality basis is very difficult in wheat as value addition is  
40 perceived by several grain properties and end-products. Here, a novel approach has been  
41 developed and tested by deriving wheat quality index based on principal component analysis of  
42 13 physico-chemical grain parameters and 3 end products of 45 wheat varieties. Depending upon  
43 the observed index range (0.15 to 0.71), the cultivars were assorted into 3 distinct classes *i.e.*  
44 elite, moderate and poor. The top group ascertained high quality standards of grain suited for  
45 bread and *chapati* whereas bottom group assured better cookies quality. This technique was also  
46 tested to differentiate quality enriched test sites within a zone or demarcate the most suited  
47 production environments to harness good quality wheat. The index will have an implication on  
48 farmers (premium price for varietal segregation), industry (product specific quality cultivars),  
49 and consumers (superior quality products).

50

51

52 **Key words:** Wheat quality, production environments, value addition, wheat quality index

53

54

55

56

57

58

59

60

61

62

63

64

65

66

67

68

69

70

71

72

73

74

75

76

77

## 78 **1. Introduction**

79 Wheat (*Triticum* spp.) alone constitutes nearly one-third of the world's total cereal consumption  
80 (FAO, 2003) and is a staple food in many countries including India. Although this staple food  
81 crop is mostly consumed as unleavened flat bread (*chapatti*), 15% of the harvested produce goes  
82 to the baking industry of the country for different bakery products including bread and cookies.  
83 Value addition properties of wheat therefore, are vital not only for domestic consumption but for  
84 the baking industry as well. Wheat quality has many shades and presently, it is described through  
85 various parameters. Wheat varieties can easily be distinguished for a single quality parameter.  
86 Wheat quality is important for different stakeholders in the wheat value chain i.e. farmers (bold  
87 and plump grain), millers (test weight and flour yield), food processors (processing quality) and  
88 consumers (end-use and nutritional quality) (Guzman et al., 2019). There are number of  
89 component quality parameters including grain appearance, test weight, grain protein, grain  
90 hardness, sedimentation, gluten content, gluten index, iron, zinc, phenol score, flour extraction  
91 were utilized either individually or in a combination to categorize the wheat varieties suitable for  
92 specific end-products like bread, biscuit, and *chapatti* score. Based on these one or two  
93 component traits, wheat varieties have been classified in to different product specific genotypes  
94 in different countries and HS490 for better biscuit quality is one such example in India.  
95 The relationship of GlutoPeak indices with various conventional quality parameters including  
96 grain hardness, sedimentation value, farinograph, alveograph were studied to ascertain the utility  
97 of GlutoPeak test to predict the wheat flour baking properties (Gucbilmez et al., 2019). SDS  
98 sedimentation test could be utilized to predict the baking quality and gluten strength and also as a  
99 rapid test in wheat breeding programs (Carter et al., 1999). Soft endosperm genes in wheat are  
100 responsible for better biscuit-making ability through associated traits like low alveograph  
101 stability, strength, P/L ratio, and protein content, and high alveograph extensibility, biscuit  
102 diameter (Labuschagne et al., 1997). In a similar study to unravel the effect of soft endosperm on  
103 biscuit quality was attempted by Ma et.al. (2018) and revealed that the soft wheat varieties with  
104 low protein contents (7.9-9.7%), low sedimentation volume (20.0-32.0 ml), and low damaged  
105 starch contents (1.9-3.4%) are desirable traits for good biscuit making quality. A study of  
106 different physico-chemical parameters including grain appearance score, hardness, test weight,  
107 thousand kernel weight, protein, gluten content and index, sedimentation value, phenol test,  
108 carotenoids, diastatic activity to ascertain their role in *chapatti* making quality by Kumar et al.,  
109 (2018) revealed a clear role of grain hardness and diastase activity, conversely phenol score may

110 not serve as a suitable indicator of chapatti quality. Bonafede et. al. (2015) studied wheat NILs to  
111 understand the effect of *Glu-3* and *Gli-1* loci on bread making quality through different allelic  
112 combinations of *Glu3/Gli-1*.

113  
114 Genetic resource good for respective quality trait had been distinguished from the commercial  
115 wheat varieties in India too (Mohan et al., 2013), but identification based on multiple quality  
116 traits is rather complex and has not been attempted yet. It always desired that the varieties picked  
117 for a particular end-product should also possess a combination of other desirable attributes as  
118 well like grain appearance, nutritional values, processing quality etc. A variety with high baking  
119 potential and good a combination of other desired grain quality attributes is certainly better than  
120 the one which has good end-product quality but lacks in some important grain properties. There  
121 are also incidents when a genotype possesses a good combination of the desired grain quality  
122 features but the quality of the end-products is not up to the mark. At a time when the relevance of  
123 good quality wheat is picking up across the globe, a uniform system is utmost important to  
124 differentiate the high-rank wheat cultivars with several good quality features. Although it sounds  
125 astonishing to find a genotype which has all desired value addition properties but the varietal  
126 distinction is necessary especially when a big bunch of cultivars is under cultivation. This study  
127 is an attempt to address this snag by converting the multivariate wheat quality evaluation into a  
128 single window system named as 'Wheat Quality Index'. The data generated by the All India  
129 Coordinated Research Project on Wheat and Barley (AICRPW&B) on grain quality attributes of  
130 popular irrigated bread wheat varieties have been used to test this unique statistical approach  
131 which can be useful to rank value addition properties of wheat germplasm.

132

## 133 **2. Materials and methods**

134

### 135 *2.1 Study materials and value addition properties*

136 Popular wheat varieties used as a check in timely-sown (TS) and late-sown (LS) yield evaluation  
137 trial series conducted by AICRPW&B in five mega zones of the country *i.e.* Northern Hills Zone  
138 (NHZ), North Western Plains Zone (NWPZ), North Eastern Plains Zone (NEPZ), Central Zone  
139 (CZ) and Peninsular Zone (PZ); were selected for this investigation. The study material involved  
140 four years of performance (period: 2014-17) of 45 high yielding irrigated wheat varieties at 3-5  
141 test sites. Grain samples received from each test site were analyzed at the headquarter of ICAR-

142 IIWBR located at Karnal, India as per the international standards (AACC, 2000). Data recorded  
143 on 13 grain quality parameters includes grain appearance score, test weight, grain hardness  
144 index, sedimentation value, grain protein content at 14% grain moisture, grain load on protein  
145 content *i.e.* protein yield per hectare, wet gluten content, gluten index, *Glu 1* score, iron and zinc  
146 contents and extraction rate. Besides, phenol test score data was also included as polyphenol  
147 oxidase (PPO) activity is known to have strong negative impact on *chapati* quality. Data about  
148 end-products quality included *chapati* quality score, bread loaf volume, bread quality score and  
149 biscuit spread factor.

150

## 151 2.2 Statistical analysis

152 Four year's mean value of each variety for each parameter were computed and principal  
153 component analysis (PCA) was used to derive the composite quality index based upon a whole  
154 array of grain quality attributes. Since the wheat quality indicator variables have different units  
155 of measurement (see Table S1, column 1), they were normalized using the following formula  
156 (Eq. 1 and 2) to make them scale-free for comparison as outlined by Mahida and Sendhil (2017).  
157 Equation (1) shows the normalization formula used for indicator variables having a positive  
158 functional relationship with the wheat quality as observed in bread and *chapati*.

159

160

$$161 \quad \text{Normalisation} = \frac{(\text{Actual} - \text{Minimum})}{(\text{Maximum} - \text{Minimum})} \quad \dots (1)$$

162

163 In the case of variables that have a negative association with end-products like biscuit spread  
164 factor, the following equation (2) was used.

165

166

$$167 \quad \text{Normalisation} = \frac{(\text{Maximum} - \text{Actual})}{(\text{Maximum} - \text{Minimum})} \quad \dots (2)$$

168

169 Post normalization, weights have to be assigned to the selected wheat quality indicator  
170 variables so that aggregation can be done to derive the composite WQI. We adopted the PCA  
171 approach for the calculation of weights due to its merit over other available techniques as well as  
172 based on Kaiser criterion (Kaiser, 1960) that selects the principal components having more than

173 'one' Eigen value to capture the maximum variation in the data matrix. We used the functional  
174 framework as indicated in Equation (3).

175  
176 
$$X_t = \Lambda_t F_t + e_t \quad \dots (3)$$

177 where,  $X_t$  is the N-dimensional vector of variables affecting the wheat quality,  $\Lambda_t$  is  $r \times 1$  common  
178 factor,  $F_t$  is the factor loading, and  $e_t$  is the associated idiosyncratic error-term of order  $N \times 1$ .

179 Weights for each wheat quality variable were calculated from the PCA results as indicated in  
180 Equation (4)

181  
182 
$$W_i = \sum |L_{ij}| E_j \quad \dots (4)$$

183  
184 where,  $W_i$  is the weight of the  $i^{\text{th}}$  indicator variable,  $E_j$  is the Eigen value of the  $j^{\text{th}}$  factor, and  $L_{ij}$   
185 is the loading value of the  $i^{\text{th}}$  variable on  $j^{\text{th}}$  factor. After deriving the weights for all the  
186 variables, the composite WQI for each genotype has been calculated using Equation (5)

187  
188  
189 
$$\text{WQI}_{\text{Genotype}} = \frac{\sum_{i=1}^n X_i W_i}{\sum_{i=1}^j W_i} \quad \dots (5)$$

190  
191  
192  
193  
194 where,  $X_i$  is the normalized value of  $i^{\text{th}}$  wheat quality indicator variable and  $W_i$  is the weight of  
195 the  $i^{\text{th}}$  variable. This technique had been earlier used by Mamrutha et al., (2020) to develop stress  
196 screening index for prioritizing hotspot locations for wheat under Indian environments and Rana  
197 et al., (2015) to derive salt tolerance index. Based upon WQI, the genotypes were classified into  
198 three categories *i.e.* elite, moderate and poor by using the following formula.

- 199  
200  
201 • Elite =  $\text{WQI} > (\text{Mean} + 0.5 \text{ Standard deviation})$   
202 • Moderate =  $(\text{Mean} - 0.5 \text{ Standard deviation}) < \text{WQI} < (\text{Mean} + 0.5 \text{ Standard deviation})$   
203 • Poor =  $\text{WQI} < (\text{Mean} - 0.5 \text{ Standard deviation})$

204  
205 The quality index was derived for bread and *chapati* separately and in combinations as  
206 well. Barring phenol test score, the preference to wheat grain quality was positive in all such

207 computations. Trait specificity was just the opposite, while deriving the quality index for the  
208 biscuit. Apart from the aforementioned analytical tools and techniques, Pearson's correlation  
209 coefficient was calculated to study the inter-trait relationship and Student's "t-test" was applied  
210 to differentiate grain quality characteristics of two groups. Coefficient of variation (CV) was also  
211 calculated to gauge diversity in the study material.

212

213

### 214 **3. Results**

#### 215 *3.1 Diversity in wheat quality parameters*

216 The study material which was a bunch of high yielding popular wheat varieties of diverse Indian  
217 production environments, expressed diversity in several grain quality attributes (Table S1). Since  
218 the principal component analysis is largely based upon the variation level and inter-trait  
219 relationship; extent of variation was examined in the study material. Diversity level was very  
220 high in phenol test score, gluten index, sedimentation value and protein yield (CV: above 15 %);  
221 moderate in biscuit spread factor, grain hardness index, wet gluten content, and Glu 1 score (CV:  
222 10 to 15%); low in bread quality score, grain appearance score, iron, zinc and protein contents  
223 (CV: 5 to 10%); and very low in bread loaf volume, flour extraction rate, chapatti quality score  
224 and test weight (CV: below 5%).

225

226 Physical grain quality was good in the majority of the varieties as grain appearance score  
227 was  $\geq 6.0$  in 30 genotypes. Test weight below 78.0 kg/hl was also noticeable only in 9  
228 genotypes. Protein concentration was also satisfactory in the study material as only 10 genotypes  
229 expressed protein content below 11.0% whereas protein yield was below 500 kg/ha only in 16  
230 varieties. Since Indian wheats generally have hard grain texture, soft grain texture was witnessed  
231 only in one wheat variety cultivated in the hills *i.e.* HS 490. Gluten strength was quite good in  
232 the study material as 18 varieties registered sedimentation value  $\geq 50$ ml and just 5 were below  
233 40ml. Overall flour recovery was also satisfactory as extraction rate was  $\geq 70\%$  in 19 varieties  
234 and below 69% only in 7 genotypes. Reaction to phenol was quite diverse but score below 5.0  
235 was witnessed only in 11 test entries. Gluten content in the selected gene pool was also  
236 satisfactory as only 7 genotypes had wet gluten content below 25%. Varieties with a wet gluten  
237 content of the range 32-36% were also cited in the study material. Quality of the gluten was also

238 quite befitting as gluten index was below 50% only in 6 genotypes. *Glu 1* score was perfect 10 in  
239 16 genotypes and only 4 genotypes had *Glu 1* score below 8. *Chapati* quality was good in the  
240 majority of the material as a score below 7.00 was noticed only in 2 cultivars. Traditionally,  
241 bread quality in the commercial Indian wheat cultivars is not rated very high. In this  
242 investigation also, only one-third material expressed bread loaf volume  $\geq 575$ cc but the bread  
243 quality score over 7.5 was observed only in 4 test entries. Obviously, biscuit quality was not  
244 good in this set of material for want of grain softness. Biscuit spread factor  $\geq 10.0$  was witnessed  
245 in the lone soft grain variety *i.e.* HS 490 but biscuit spread factor above 8.5 could be witnessed in  
246 two hard grain varieties of NHZ.

247

### 248 3.2 Germplasm assortment for the end-products

#### 249 3.2.1 Quality index for bread and chapati

250 This holistic approach widened the difference between 45 test entries as the quality index varied  
251 from 0.197 to 0.717 in *chapati* and 0.165 to 0.724 in bread. In the elite groups of bread and  
252 *chapati*, 15 varieties occupied each cluster out of which 13 were superior for both bread as well  
253 as *chapati* (Table 1). Since the majority of the varieties were common in the two clusters,  
254 another attempt was made to derive quality index which involved *chapati* as well bread quality  
255 parameters and it was named as the wheat quality index (WQI). Range of WQI was almost  
256 similar (0.154 to 0.711) to quality index of bread or *chapati*. The elite group formed on this basis  
257 also contained 15 genotypes and this cluster involved all 15 varieties of the elite bread group and  
258 13 entries of the elite *chapati* group. Bread and *chapati* quality in the high ranking genotypes  
259 was quite good as cluster mean was 573cc for bread loaf volume and 7.77 for *chapati* quality  
260 score.

261

262 Table 1: Elite varieties for the quality index of bread and *chapati*

| Variety  | Production environment | Bread | <i>Chapati</i> | Bread cum <i>chapati</i> |
|----------|------------------------|-------|----------------|--------------------------|
| RAJ 4083 | PZ-LS                  | 0.724 | 0.717          | 0.711                    |
| HD 2932  | PZ-LS                  | 0.696 | 0.701          | 0.706                    |
| UAS 304  | PZ-TS                  | 0.676 | 0.637          | 0.675                    |
| HD 3226  | NWPZ-TS                | 0.661 | 0.644          | 0.648                    |
| PBW 752  | NWPZ-LS                | 0.651 | 0.658          | 0.632                    |
| NIAW 917 | PZ-TS                  | 0.650 | -              | 0.632                    |
| DBW 90   | NWPZ-LS                | 0.627 | 0.654          | 0.622                    |
| HD 3059  | NWPZ-LS                | 0.626 | 0.651          | 0.623                    |



---

|           |         |       |       |       |
|-----------|---------|-------|-------|-------|
| HD 2864   | CZ-LS   | 0.618 | 0.647 | 0.634 |
| MP 4010   | CZ-LS   | 0.615 | 0.632 | 0.610 |
| MP 3336   | CZ-LS   | 0.615 | 0.657 | 0.629 |
| HD 3090   | PZ-LS   | 0.612 | -     | 0.599 |
| MACS 6478 | PZ-TS   | 0.612 | 0.633 | 0.636 |
| WH 1124   | NWPZ-LS | 0.601 | 0.643 | 0.604 |
| HD 2932   | CZ-LS   | 0.606 | 0.630 | 0.622 |
| DBW 173   | NWPZ-LS | -     | 0.605 | -     |
| HD 3249   | NEPZ-TS | -     | 0.602 | -     |

---

263

264

### 265 3.2.2 *Quality index for cookies*

266 In this approach, bread and *chapati* parameters were excluded and the quality index was derived  
267 with biscuit spread factor. Variation was quite large 0.196 to 0.702 for biscuit quality index also.  
268 Again, 15 varieties occupied the top group in biscuit quality index and the average biscuit spread  
269 factor was 8.0 (Table S2). There is only one soft wheat variety in the country which has biscuit  
270 spread factor more than 10 *i.e.* HS 490 and this genotype occupied the 1<sup>st</sup> ranking in biscuit  
271 quality index (Anonymous, 2016). Although the varieties under study lacked grain softness, all  
272 genotypes with biscuit spread factor over 8.0 were noticeable in this elite group. Six varieties in  
273 this group had biscuit spread factor below 7.5 but they could find a place in the top group  
274 because of some grain properties suited for cookies. The genotype (HS490) ranked 1<sup>st</sup> in this  
275 analysis (HS 490) was the poorest in bread and *chapati* quality indices. In fact, a majority of the  
276 entries clustered in the poor group, were the ones which were placed in the elite group formed  
277 based on bread or *chapati* alone.

278

279 Three varieties each of NWPZ (HD 3086, WH 1105 and PBW 550) and NEPZ (DBW 39,  
280 NW 2036 and HI 1563) registered moderate quality standards in all the products. There was no  
281 wheat variety which could be rated inferior for every product. There were certain exceptional  
282 cases where the product quality was good but the quality index was low. It happened in the case  
283 of HD 2733 for bread (loaf volume: 585cc) and DBW 168 for *chapati* (score: 8.15). HD 2733  
284 suffered because of grain protein content and gluten properties whereas DBW 168 lacked in  
285 grain hardness and extraction rate.

286

### 287 3.2.3 *Screening advantage with wheat quality index*

288 Since a majority of the varieties placed in the bread and *chapati* indexes featured in the  
289 combined analysis, WQI was further examined for usefulness in germplasm assortment. This  
290 index alone can also be applied to screen the biscuit quality enriched germplasm as well. To  
291 substantiate it further, the elite and poor groups formed on the basis WQI were compared for the  
292 end-products quality (Table 2). Bread or *chapati* quality in the elite group was significantly  
293 better than the poor group. On the contrary, biscuit spread factor in the poor group was  
294 significantly higher than the elite group. It reconfirmed that WQI alone can be quite useful for  
295 varietal distinction in different end-products.

296

297 Table 2: Mean values of grain quality parameter in diverse quality groups

| Quality parameter            | Elite | Poor | P value |
|------------------------------|-------|------|---------|
| Bread loaf volume (cc)       | 573   | 535  | 0.000   |
| Bread quality score          | 7.05  | 6.08 | 0.000   |
| <i>Chapati</i> quality score | 7.77  | 7.48 | 0.010   |
| Biscuit spread factor        | 7.08  | 8.23 | 0.002   |
| Grain appearance score       | 6.34  | 5.88 | 0.000   |
| Test weight (kg/hl)          | 80.0  | 79.1 | 0.075   |
| Grain protein content (%)    | 12.1  | 10.5 | 0.000   |
| Protein yield (kg/ha)        | 548   | 450  | 0.001   |
| Sedimentation value (ml)     | 50.4  | 44.4 | 0.042   |
| Grain hardness index         | 76.3  | 67.3 | 0.075   |
| Wet gluten content           | 31.5  | 25.5 | 0.000   |
| Gluten index (%)             | 63.9  | 56.6 | 0.049   |
| GLU 1 score                  | 8-10  | 6-10 | -       |
| Phenol test score            | 5.09  | 5.78 | 0.137   |
| Flour extraction rate (%)    | 69.9  | 66.1 | 0.002   |
| Iron content (ppm)           | 40.4  | 38.5 | 0.070   |
| Zinc content (ppm)           | 37.8  | 33.4 | 0.001   |

298 \*, \*\* and \*\*\* denote the level of significance at  $P$  0.05, 0.01 and 0.001, respectively.

299

300 Besides bread and *chapati* quality, the elite material was superior in grain appearance,  
301 protein content and protein yield, gluten properties like gluten content, gluten strength  
302 (sedimentation value) and gluten quality (gluten index), flour recovery and grain zinc density.  
303 The difference in grain hardness could not be a witness and it was not expected also as the study  
304 material was largely devoid of soft grains. A significant difference in the two contrasting group

305 could not be established in test weight, iron content and phenol reaction. It means that test  
 306 weight, grain hardness, iron and phenol reaction did not play any decisive role in defining WQI  
 307 of the Indian varieties involved in this study.

308

### 309 3.2.4 Quality features in the screened elite material

310 The quality index in the elite material screened based on WQI ranged from 0.60 to 0.71. In  
 311 *chapati* quality, genotypes with score 7.5 to 8.0 are rated very high and every entry of this group  
 312 had *chapati* score within this range (Table 3). Regression coefficient derived by computing 13  
 313 grain quality components with the end-products was found highly significant ( $P$  0.001) in  
 314 *chapati* ( $R^2$ : 0.88). Therefore, prospects of tracing varieties good for *chapati* making were quite  
 315 high by this technique. Some varieties with *chapati* score around 8.0 or above did occur in the  
 316 moderate and poor groups also like HI 1563 and DBW 168 but they missed few vital grain  
 317 quality attributes. These two varieties were just moderate in grain appearance score, test weight  
 318 and wet gluten content. Protein yield was very low in HI 1563 whereas DBW 168 lacked in grain  
 319 hardness and gluten index.

320

321 Table 3: Value addition properties of elite varieties for good *chapati* and bread quality

| Variety                                  | Environment | GAS | TW | GPC  | Fe | Zn | SV | Glu | GHI | FER  | WGC | GI | CQS | BLV | BQS | BSF | Grade           |
|------------------------------------------|-------------|-----|----|------|----|----|----|-----|-----|------|-----|----|-----|-----|-----|-----|-----------------|
| <b><i>I. Good quality genotypes</i></b>  |             |     |    |      |    |    |    |     |     |      |     |    |     |     |     |     |                 |
| HD 2932                                  | PZ-LS       | 6.3 | 80 | 12.7 | 40 | 38 | 47 | 8   | 72  | 70.2 | 36  | 62 | 8.0 | 585 | 7.5 | 7.4 | A <sup>++</sup> |
| UAS 304                                  | PZ-TS       | 6.3 | 81 | 11.7 | 47 | 43 | 44 | 8   | 75  | 69.9 | 32  | 49 | 7.8 | 595 | 7.9 | 6.7 | A <sup>+</sup>  |
| NIAW 917                                 | PZ-TS       | 6.1 | 82 | 11.8 | 46 | 36 | 41 | 8   | 84  | 70.0 | 31  | 61 | 7.5 | 590 | 7.9 | 6.7 | A <sup>+</sup>  |
| RAJ 4083                                 | PZ-LS       | 6.6 | 80 | 12.1 | 43 | 40 | 51 | 10  | 80  | 71.7 | 33  | 68 | 7.7 | 583 | 7.4 | 6.7 | A               |
| HD 3090                                  | PZ-LS       | 6.4 | 80 | 12.3 | 42 | 41 | 43 | 8   | 77  | 69.7 | 30  | 60 | 7.6 | 577 | 7.2 | 7.3 | A               |
| MACS 6478                                | PZ-TS       | 6.2 | 79 | 12.0 | 36 | 36 | 50 | 8   | 74  | 70.2 | 33  | 53 | 8.1 | 578 | 7.1 | 6.4 | A <sup>+</sup>  |
| HD 2864                                  | CZ-LS       | 6.4 | 82 | 12.1 | 39 | 35 | 45 | 8   | 71  | 69.4 | 31  | 62 | 8.0 | 557 | 6.8 | 7.1 | A <sup>+</sup>  |
| MP 3336                                  | CZ-LS       | 6.7 | 81 | 12.6 | 40 | 38 | 39 | 8   | 71  | 69.6 | 34  | 48 | 8.0 | 549 | 6.4 | 7.0 | A <sup>+</sup>  |
| HD 2932                                  | CZ-LS       | 6.4 | 81 | 12.6 | 37 | 34 | 49 | 8   | 68  | 69.0 | 33  | 55 | 8.0 | 563 | 7.0 | 6.9 | A <sup>+</sup>  |
| MP 4010                                  | CZ-LS       | 6.8 | 82 | 12.7 | 40 | 38 | 41 | 8   | 70  | 69.2 | 33  | 51 | 7.8 | 556 | 6.5 | 6.8 | A               |
| HD 3226                                  | NWPZ-TS     | 6.1 | 78 | 12.0 | 39 | 37 | 64 | 10  | 76  | 69.0 | 301 | 79 | 7.5 | 601 | 7.4 | 7.6 | A               |
| PBW 752                                  | NWPZ-LS     | 6.0 | 79 | 11.9 | 40 | 40 | 66 | 10  | 83  | 69.5 | 29  | 83 | 7.5 | 577 | 6.9 | 7.0 | A               |
| HD 3059                                  | NWPZ-LS     | 6.3 | 79 | 11.8 | 38 | 37 | 61 | 10  | 82  | 70.2 | 29  | 77 | 7.7 | 569 | 6.7 | 7.6 | A               |
| DBW 90                                   | NWPZ-LS     | 6.2 | 78 | 11.5 | 41 | 37 | 60 | 10  | 83  | 70.5 | 29  | 76 | 7.6 | 565 | 6.6 | 7.5 | A               |
| WH 1124                                  | NWPZ-LS     | 6.3 | 78 | 11.2 | 40 | 39 | 58 | 10  | 81  | 70.4 | 28  | 77 | 7.7 | 556 | 6.5 | 7.5 | A               |
| <b><i>II. Poor quality genotypes</i></b> |             |     |    |      |    |    |    |     |     |      |     |    |     |     |     |     |                 |
| DBW 168                                  | PZ-TS       | 5.9 | 78 | 11.7 | 38 | 34 | 43 | 6   | 36  | 67.0 | 29  | 44 | 8.2 | 555 | 6.7 | 7.9 | C <sup>+</sup>  |
| GW 322                                   | PZ-TS       | 6.0 | 79 | 11.0 | 36 | 39 | 40 | 8   | 80  | 70.1 | 30  | 51 | 7.7 | 541 | 6.5 | 7.1 | C               |
| K 0307                                   | NEPZ-TS     | 6.1 | 79 | 11.2 | 42 | 36 | 40 | 8   | 79  | 70.7 | 27  | 57 | 7.6 | 536 | 6.0 | 7.8 | C               |
| DBW 187                                  | NEPZ-TS     | 5.9 | 78 | 10.6 | 43 | 27 | 65 | 10  | 71  | 69.1 | 26  | 63 | 7.7 | 530 | 5.8 | 8.0 | C               |

|         |         |     |    |      |    |      |    |    |    |      |    |    |     |     |     |      |                |
|---------|---------|-----|----|------|----|------|----|----|----|------|----|----|-----|-----|-----|------|----------------|
| K 1006  | NEPZ-TS | 5.9 | 79 | 10.9 | 41 | 36   | 39 | 8  | 78 | 69.9 | 28 | 47 | 7.5 | 557 | 6.4 | 7.9  | C              |
| HPW 349 | NHZ-TS  | 5.7 | 81 | 9.3  | 35 | 32   | 52 | 10 | 71 | 64.1 | 21 | 80 | 7.4 | 545 | 6.3 | 8.8  | C <sup>+</sup> |
| HS 507  | NHZ-TS  | 6.2 | 81 | 9.3  | 39 | 32   | 46 | 10 | 79 | 64.7 | 23 | 61 | 7.4 | 540 | 6.3 | 7.9  | C              |
| VL 804  | NHZ-TS  | 6.1 | 81 | 10.2 | 33 | 29   | 40 | 6  | 81 | 65.0 | 24 | 62 | 7.7 | 542 | 6.3 | 7.6  | C              |
| VL 907  | NHZ-TS  | 5.7 | 79 | 9.8  | 36 | 32   | 39 | 8  | 69 | 63.4 | 25 | 52 | 7.3 | 547 | 6.4 | 8.2  | C              |
| VL 892  | NHZ-LS  | 5.9 | 79 | 11.1 | 41 | 36   | 45 | 8  | 71 | 63.1 | 25 | 52 | 7.0 | 499 | 5.1 | 8.3  | C              |
| HS 490  | NHZ-LS  | 5.4 | 75 | 10.9 | 39 | 34.9 | 40 | 8  | 26 | 60.6 | 22 | 54 | 6.9 | 497 | 5.0 | 11.1 | C <sup>+</sup> |

322

323

324 Quality of the bread is assessed by bread loaf volume and bread quality score. A total of 8  
 325 varieties registered bread loaf volume and bread quality score better than mean of the elite  
 326 cluster. Under Indian condition, wheat varieties with bread loaf volume  $\geq 575$ cc and bread  
 327 quality score  $\geq 7.5$  are rated good and varieties like HD 2932, UAS 304 and NIAW 917 qualified  
 328 this bench mark, too. Regression coefficient achieved by regressing 13-grain quality attributes  
 329 with this end-product was also highly significant but the magnitude of association was not as  
 330 high as noticed in the case of *chapati*. In this exercise,  $R^2$  value was just 0.545 ( $P$ : 0.008) in case  
 331 of bread loaf volume and 0.576 ( $P$ : 0.004) in case of bread quality score. Therefore, the number  
 332 of high rated bread quality entries was less in the elite group. But when the comparison was  
 333 made with the poor group; no variety could cross the threshold of 575cc loaf volume and 7.0  
 334 bread quality score. Maximum loaf volume and bread quality score achieved in this group were  
 335 557cc and 6.71, respectively. It was obvious that good quality bread cannot be made from  
 336 varieties rated poor by WQI. *Chapati* quality was definitely good in DBW 168 but it could not  
 337 touch the elite group because of soft grain texture, high bran content and poor gluten quality.

338

339 Although the grain quality properties declined in the poor group, chances of locating the  
 340 good quality cookies were quite high. As done for bread and *chapati*,  $R^2$  value was calculated for  
 341 biscuit also by regressing the 13-grain quality parameters against the biscuit spread factor. The  
 342 regression coefficient was very high in the cookies also (0.83). Therefore, the prospects of  
 343 discovering cookie material brightened in the cluster where grain quality feature was poor. It  
 344 underlined that although grain softness is important for biscuit making, it is not absolute and a  
 345 few other traits also matter in the quality of this product. Chances of locating varieties good for  
 346 cookies become higher when WQI is applied in the negative direction. All varieties with biscuit  
 347 spread factor  $\geq 8.0$  could be seen in the poor group formed based on WQI. At a time when the  
 348 only soft grain variety placed lowest at WQI ranking *i.e.* HS 490 recorded biscuit spread factor  $\geq$

349 10, there was another hard grain variety (hardness index: 71) close to this benchmark *i.e.* HPW  
 350 349 with biscuit spread factor 8.82.

351  
 352 **3.3 Marking regional specificity in value addition**

353 Study material in this analysis belonged to 10 diverse production environments of India. It was  
 354 evident that material clustered in different groups (Table 1, S2 & 3) did not represent every  
 355 environment. Grouping made based on WQI indicated that value addition properties in NHZ  
 356 were poor and the material suited better for cookies. High yielding varieties of NWPZ were  
 357 either moderate or good in wheat quality. The timely-sown material of this region was generally  
 358 moderate whereas late-sown varieties excelled in value addition properties. None of the NEPZ  
 359 varieties could be rated high in wheat quality and they either belonged to moderate or poor  
 360 category. In this zone, the late-sown wheat was of moderate quality whereas timely-sown wheat  
 361 could either be moderate or poor. In central India, the late-sown varieties were good in quality  
 362 whereas timely-sown materials were just moderate. Varieties of the peninsular region were  
 363 generally good. Couples of varieties like GW 322 and DBW 168 could be rated poor but their  
 364 *chapati* quality score was quite good.

365  
 366 **Table 4: Categorization of Indian wheat varieties in terms of quality and production condition**

| Zone | Elite group                  |                                    | Moderate group                                                  |                           | Poor group                      |                |
|------|------------------------------|------------------------------------|-----------------------------------------------------------------|---------------------------|---------------------------------|----------------|
|      | TS                           | LS                                 | TS                                                              | LS                        | TS                              | LS             |
| NHZ  | Nil                          | Nil                                | Nil                                                             | Nil                       | VL 804, VL 907, HS 507, HPW 349 | HS 490, VL 892 |
| NWPZ | HD 3226                      | HD 3059, PBW 752, DBW 90, WH 1124, | HD 3086, HD 2967, DBW 88, WH 1105, PBW 550, DBW 222, DPW 621-50 | WH 1021, DBW 173          | Nil                             | Nil            |
| NEPZ | Nil                          | Nil                                | DBW 39, HD 2967, HD 2733, HD 3249                               | NW 2036, HD 2985, HI 1633 | DBW 187, K 1006, K 307          | Nil            |
| CZ   | Nil                          | HD 2864, HD 2932, MP 4010, MP 3336 | HI 1544, GW322                                                  | Nil                       | Nil                             | Nil            |
| PZ   | MACS 6478, NISW 917, UAS 304 | RAJ 4083, HD 2932, HD 3090         | MACS 6222                                                       | Nil                       | DBW168, GW 322                  | Nil            |

367

368 In India, there are two categories of irrigated wheat *i.e.* timely-sown wheat and late-sown  
369 wheat. This technique was applied to know whether these two categories of wheat also express  
370 any major difference overall wheat quality. Across the country, 11 varieties figured in the late-  
371 sown group whether the number of timely-sown varieties was limited to just 4. In the moderate  
372 group however, the number of timely-sown varieties (15) was much higher than the late-sown  
373 varieties.

374

### 375 3.4 Location specificity within the region

376 This novel approach based on multivariate grain quality analysis can also be applied to identify  
377 the pockets where grain quality can be harnessed better within a given region. Demarcation to  
378 verify quality enriched sites also becomes very difficult when the number of variables is high.  
379 This multivariate approach was applied to resolve such problems in NWPZ which is not only the  
380 most productive wheat land of the country but both production conditions are relevant due to  
381 rice-wheat cropping system (Mohan et al., 2017). Therefore, it is imperative to decide locations  
382 and the appropriate production condition to raise good quality wheat in this high-yield territory.  
383 Quality data in this zone was derived from five test sites *i.e.* Ludhiana, Durgapura, Delhi, Hisar  
384 and Pantnagar in two production conditions *i.e.* timely-sown and late-sown. Five years mean for  
385 the period 2013 to 2017 was computed in each situation and the varieties considered were WH  
386 1105, HD 2967, HD 3059 and DBW 88 for timely-sown wheat and WH 1021, WH 1024, HD  
387 3059 and DBW 90 as late-sown wheat. The quality index, in this case was calculated based on  
388 all value addition properties except phenol test score as it did not show any association with the  
389 quality index (Table 2). In this exercise, biscuit spread factor was also included and it was the  
390 only factor labelled with negative impact in this analysis. Range of WQI for the test centers was  
391 also quite large (0.31 to 0.64) therefore it became very easy not only to distinguish good quality  
392 sites from the bad ones but also to prioritize the production condition to harness high quality of  
393 wheat (Fig 1). Delhi and Durgapur emerged as the pockets best suited to grow high quality wheat  
394 in the zone. Results indicated that preference to late-sown wheat at Delhi and timely-sown at  
395 Durgapura were the two best options to harness good quality of the harvested produce in NWPZ.

396

## 397 4. Discussion

398 Quality of wheat variety cannot be defined by the end-products alone nor wise to look only  
399 through the prism of end-products. Wheat quality is multidimensional and cannot be described  
400 through a single parameter. But to pick the best material or test site on overall superiority, a  
401 single window system is required. This exercise provides a tool where all features of value  
402 additions are depicted by a single a factor. And this single factor has been derived by taking into  
403 account the overall variation and inter-trait relationship in all wheat quality parameters. This  
404 novel and holistic approach is quite sound, flexible and can be applied with any number of  
405 variables irrespective of the population size. This study done in the Indian environments  
406 involved 17 parameters and the population size was also not big. If the traits of importance are  
407 less in some countries or the germplasm under screening is large, even then this technique can be  
408 perfected with equal precision. The authors used principal component analysis to put weight to  
409 the different quality traits. But this weight can also be assigned depending upon the importance a  
410 country or system gives to a particular trait.

411

#### 412 *4.1 The Validity of the wheat quality index*

413 The soundness of this technique was substantiated when value addition properties were  
414 examined in the elite and poor groups separated by this method (Table 1). The elite group was  
415 significantly better ( $P$  0.01) than the poor group in bread and *chapati* quality. It was quite  
416 obvious as a strong positive association between *chapati* and bread quality reported earlier by  
417 Mohan and Gupta (2008) was reconfirmed in this investigation as well ( $r$ : 0.41<sup>\*\*</sup>). Contributing  
418 traits in bread and *chapati* quality are most common and in contrast to the biscuit (Pena et al.,  
419 2012; Mohan et al., 2013) but there can be genotypes which are good in *chapati* but just  
420 moderate in bread making. This technique had also illustrated that genotypes with superior  
421 biscuit quality were quite frequent in the cluster where bread or *chapati* quality was generally  
422 poor. The genotype identified best through this technique *i.e.* HD 2932 was superior most in  
423 bread and *chapati* qualities but poorest in biscuit making. Similarly, the genotypes identified best  
424 in biscuit quality index *i.e.* HS 490 had highly inferior quality of bread and *chapati*. It was quite  
425 obvious and this well-established fact was again confirmed when the adverse relationship of this  
426 product was observed between bread ( $r$ : -0.40<sup>\*\*</sup>) and *chapati* ( $r$ : -0.55<sup>\*\*</sup>) in this bunch of high-  
427 yield genotypes. In Indian wheat, value addition property of late-sown wheat is rated better than  
428 the timely-sown (Mohan et al., 2011, 2017) and this technique also supported this trend. All



429 these observations underline that this technique holds true and is quite sound in judging overall  
430 the quality of wheat.

431

#### 432 *4.2 Usefulness*

433 This technique discriminates the material where product quality is good but remains unsupported  
434 by the grain quality determinants as observed in the case of DBW 168 for *chapati* and HD 2733  
435 for bread loaf volume (Table 3). Despite of good product quality, none of them could occupy  
436 place in the elite group. On the contrary, it does elate the materials which have several product  
437 supporting grain quality features but the product quality is somehow not so good. In wheat  
438 breeding, selection strategy for quality improvement differs product-wise (Mohan et al., 2013)  
439 but perfection about the roles that grain quality parameters play in defining the product quality, is  
440 yet to be achieved. This novel approach which offers best a genotype can provide in value  
441 addition is the best option for each end-product (Fig 2). When applied in the positive direction it  
442 supports bread or *chapati* making and in reverse, quality of the cookies is improvised. India has  
443 the second-largest biscuit industry in the world which cannot depend only on single soft grain  
444 genotype. Definitely, this industry must not have survived or it cannot survive based on one  
445 genotype. This analysis supports that when soft wheat is rarely cultivated, there can also be other  
446 alternates to support this industry.

447

#### 448 *4.3 Application*

449 It's quite clear that wheat quality index makes a clear distinction in germplasm assortment.  
450 Breeders indeed need a single approach to discriminate the wheat lines for value addition but the  
451 quality of the end-products always dominate in the mind. Though wheat quality index provides  
452 reasonable surety in this endeavour, this system can be further refined to mark such preferences.  
453 All varieties in the elite group can be given score 'A' but the varieties with excellent *chapati*  
454 quality (score  $\geq 8.0$ ) or good bread quality (loaf volume  $\geq 575$ cc and bread quality score  $\geq 7.5$ )  
455 can be marked as A<sup>+</sup>. If any varieties of the elite group excel in both the products, it can be  
456 glorified with A<sup>++</sup>. Similarly, if a variety clubbed in the poor group show better product quality  
457 like cookies (HS 490 and HPW 349) or *chapati* (DBW 168), they can also be demarcated as C<sup>+</sup>.

458

459 Besides germplasm assortment, this technique can also be immensely useful in the  
460 identification of the quality rich pockets or region. The usefulness of this strategy has been well



461 demonstrated under Indian conditions where quality rich pockets have been identified in a high  
462 productivity zone *i.e.* NWPZ. Value addition characteristics of a zone or production  
463 environments have also been exemplified in this investigation.

464

## 465 **5. Conclusion**

466 Distinction for quality attributes is very important in wheat and the present system to rank  
467 superiority on multiple traits basis is laborious and demanding. This arduous method of  
468 screening for each quality trait can be done away by this suggested holistic approach where a  
469 single parameter *i.e.* wheat quality index is sufficient to sort out rank superiority in germplasm  
470 screening or identify the pockets suitable to harness the desired grain quality. It is further  
471 suggested to utilize this index in the screening of large number of breeding populations at both  
472 segregating and non-segregating generations. Since industry demands product specific wheat  
473 varieties to obtain superior product quality, this holistic approach could be a method to identify  
474 product-specific genotypes based on multi-traits. This also has implications on wheat growers by  
475 getting remunerative price to the growers through segregated procurement.

476

477

## 478 **Acknowledgements**

479 The work is an outcome of a core project funded by ICAR (Project  
480 No.CRSCIWBRIL201500100182), New Delhi and the authors express their sincere thanks to  
481 the Director, ICAR-IIWBR for permitting the use of the data generated in the All India  
482 Coordinated Research Project (AICRP) on Wheat and Barley for this analysis. The efforts made  
483 by associated wheat research workers in sending grain samples of quality analysis and data  
484 reporting are also acknowledged.

485

## 486 **Authors' contribution**

487 Conceptualization (DM); Designing of the experiments (DM, GPS); Data compilation (GK, RS,  
488 OPG, VP); Formal analysis and interpretation (DM, RS, GK); Preparation of original draft (DM,  
489 RS, VP); Revision of manuscript (DM, OPG, GPS).

490

## 491 **Conflicts of interests**

492 Authors do not have any conflicts of interest. All the authors have read and approved the final  
493 manuscript.

494

## 495 **References**

- 496 1. Anonymous 2016. Progress Report of All India Coordinated Wheat & Barley  
497 Improvement Project 2015,-1G, Vol. IV, Wheat quality. Eds: R.K. Gupta, D. Mohan, Sewa  
498 IRam, Sneha D. Arwal, Vanita Pardey and G.P Singh. Indian Institute of Wheat and  
499 Barley Research Karnal, India. P-226.
- 500 2. Bonafede, M. D., Tranquilli, G., Pflüger, L. A., Peña, R. J., Dubcovsky, J. 2015. Effect of  
501 allelic variation at the *Glu-3/Gli-1* loci on breadmaking quality parameters in hexaploid  
502 wheat (*Triticum aestivum* L.). Journal of Cereal Science, 62, 143–150.  
503 doi:10.1016/j.jcs.2015.02.001
- 504 3. Carter, B. P., Morris, C. F., Anderson, J. A., 1999. Optimizing the SDS Sedimentation Test  
505 for End-Use Quality Selection in a Soft White and Club Wheat Breeding Program. Cereal  
506 Chemistry Journal, 76(6), 907–911. doi:10.1094/cchem.1999.76.6.907.
- 507 4. FAO. Food Outlook. No. 4. FAO Global Information and Early Warning System on Food  
508 and Agriculture. FAO, Rome, Italy, 2003; Available:  
509 <http://www.fao.org/docrep/005/J0381e/j0381e00.htm>.
- 510 5. Gucbilmez, C. M., Sahin, M., Akçacık, A. G., Aydoğan, S., Demir, B., Hamzaoglu, S.,  
511 Gur, S., Yakışır, E. 2019. Evaluation of GlutoPeak test for prediction of bread wheat flour  
512 quality, rheological properties and baking performance. Journal of Cereal Science, 102827.  
513 doi:10.1016/j.jcs.2019.102827.
- 514 6. Guzman, C., Karim Ammar, Velu Govindan, Ravi P Singh. 2019. Genetic improvement of  
515 wheat grain quality at CIMMYT. Front. Agric. Sci. Eng. 6(3): 265-272.
- 516 7. Kaiser, H.F., 1960. The application of electronic computers to factor analysis.  
517 Educ. Psychol. Meas. 20, 141–151.
- 518 8. Kumar, S., Sohu, V.S., Gupta S.K., Bains, N.S. 2018. Understanding the chapati making  
519 attributes of the Indian wheats –I: The physico-chemical basis. Journal of Applied  
520 and Natural Science, 10(2): 572 -592.
- 521 9. Labuschagne M.T., Claassen A., van Deventer C.S. 1997. Biscuit-making quality of  
522 backcross derivatives of wheat differing in kernel hardness. Euphytica 96:263–266, 1997.
- 523 10. Ma, F., Baik, B.-K. 2018. Soft wheat quality characteristics required for making baking  
524 powder biscuits. Journal of Cereal Science 79: 127–133. doi:10.1016/j.jcs.2017.10.016.

- 525 11. Mahida, D., Sendhil, R., 2017. Principal Component Analysis (PCA) based Indexing. *In:*  
526 Sendhil, R., Kumar, A., Singh, S., Verma, A., Venkatesh, K., Vikas, G. (Eds.),  
527 DataAnalysis Tools and Approaches (DATA) in Agricultural Sciences. ICAR-Indian  
528 Institute of Wheat and Barley Research. [https://doi:10.13140/RG.2.2.28187.57125](https://doi.org/10.13140/RG.2.2.28187.57125).
- 529 12. Mamrutha, H.M., Khobra, R., Sendhil, R., et al., 2020. Developing stress intensity index  
530 and prioritizing hotspot locations for screening wheat genotypes under climate change  
531 scenario. *Ecological Indicators*. <https://doi.org/10.1016/j.ecolind.2020.106724>.
- 532 13. Mohan D, V Tiwari and RK Gupta. 2017. Progression in yield and value addition of Indian  
533 bread wheat. *Indian J. Genet.* **77**(1), 16–24.
- 534 14. Mohan, D., Gupta R.K., 2013. Analysing grain properties of Indian bread-wheat cultivars  
535 for defining route to end-product quality and key attributes for selection. *Indian J. Genet.*  
536 **73**: 1–8.
- 537 15. Mohan, D., Gupta, R.K., 2008. Approach to harness genetic improvement in important  
538 quality attributes of Indian bread wheats. *J. Wheat Res.*, **2**: 52–56.
- 539 16. Mohan, D., Gupta, R.K., Verma, A., 2013. Characterization of popular bread wheat  
540 cultivars of India for grain quality and stable genetic resource. *Indian J. Genet.* **73**, 14–22.
- 541 17. Mohan, D., Singh, S., Gupta, R., 2011. Vibrancy of the Indian wheat in upholding yield  
542 and quality under global environmental change. Singh SS, Hanchinal RR, Singh G.,  
543 Sharma RK, Tyagi BS, Saharan MS, and Sharma Indu (eds.), *Wheat: Productivity*  
544 *Enhancement under Changing Climate*, Narosa Publishing House, New Delhi 87–94.
- 545 18. Pena, R.J., Trethowan, R., Pfeiffer, W.H., Van Ginnkel, M., 2012. Quality (end-use)  
546 improvement in wheat compositional, genetic, and environmental factors. *J. Crop Prod.* **5**,  
547 1–37.
- 548 19. Rana, V., Ram, S., Sendhil, R., Nehra, K., Sharma, I., 2015. Physiological, biochemical  
549 and morphological study in wheat (*Triticum aestivum* L.) RILs population for salinity  
550 tolerance. *J. Agric. Sci.* **7** (10): 119-128. <http://dx.doi.org/10.5539/jas.v7n10p119>.

551  
552  
553  
554  
555

556 **Figure Legends**

557 Fig. 1: Site selection through the wheat quality index in the north-western plains zone of India.

558 Number indicates wheat quality index for each test center.

559 Fig. 2. Wheat quality index (WQI) concerning quality of the end-products. X-axis represents the  
560 wheat genotypes used in the present study. Y-axis represents wheat quality index (left side) and  
561 product quality score (right side).

562

563

564

565

Wheat Production Conditions

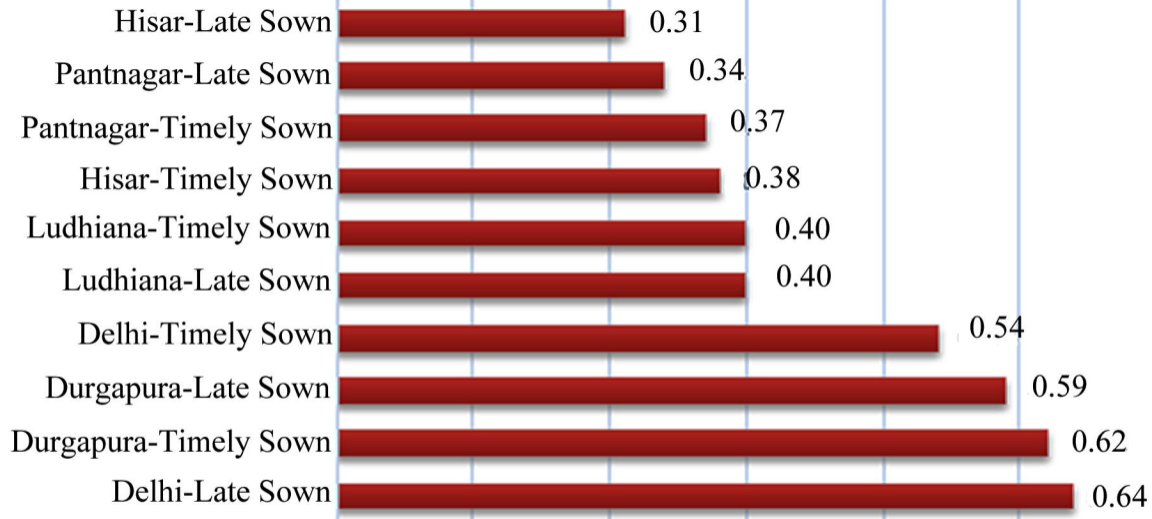

Wheat Quality Index (WQI)

Fig. 1

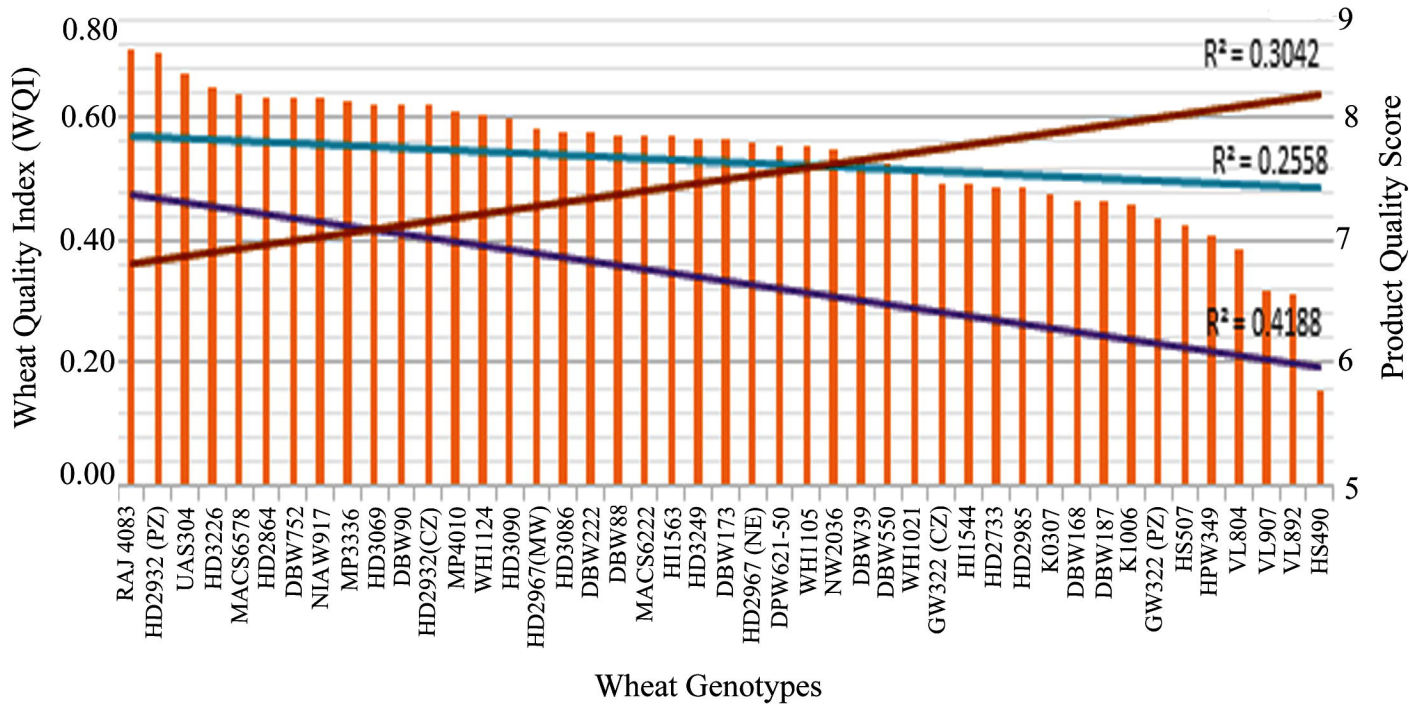

Fig 2.
